# Supplementary material for: Alkaline Phosphatase Treatment of Acute Kidney Injury in an Infant Piglet Model of Cardiopulmonary Bypass with Deep Hypothermic Circulatory Arrest
Source: Sci Rep. 2019 Oct 2;9:14175. doi: 10.1038/s41598-019-50481-w (PMC6775126; doi:10.1038/s41598-019-50481-w)
Supplement: Supplementary file 1 — Supplementary Figures [file 41598_2019_50481_MOESM1_ESM.pdf]

**Title: Alkaline Phosphatase Treatment of Acute Kidney Injury in an Infant Piglet Model of Cardiopulmonary Bypass with Deep Hypothermic Circulatory Arrest**

**Supplementary Figures**

**Authors:** Jesse A. Davidson<sup>1\*</sup>, Ludmila Khailova<sup>1</sup>, Amy Treece<sup>2</sup>, Justin Robison<sup>1</sup>, Danielle E. Soranno<sup>1</sup>, James Jagers<sup>3</sup>, Richard J. Ing<sup>4</sup>, Scott Lawson<sup>5</sup>, Suzanne Osorio Lujan<sup>1</sup>

**Institutions:** <sup>1</sup>University of Colorado Denver, Department of Pediatrics; <sup>2</sup>University of Colorado Denver, Department of Pathology; <sup>3</sup>University of Colorado Denver, Department of Surgery; <sup>4</sup>University of Colorado Denver, Department of Anesthesiology; <sup>5</sup>Children's Hospital Colorado, Heart Institute

**\*Corresponding Author:**

Jesse A. Davidson, MD, MPH, MSc

Address: 13123 East 16<sup>th</sup> Ave, Box 100, Aurora, CO 80045

Phone: (303) 524-4709

Email: jesse.davidson@childrenscolorado.org

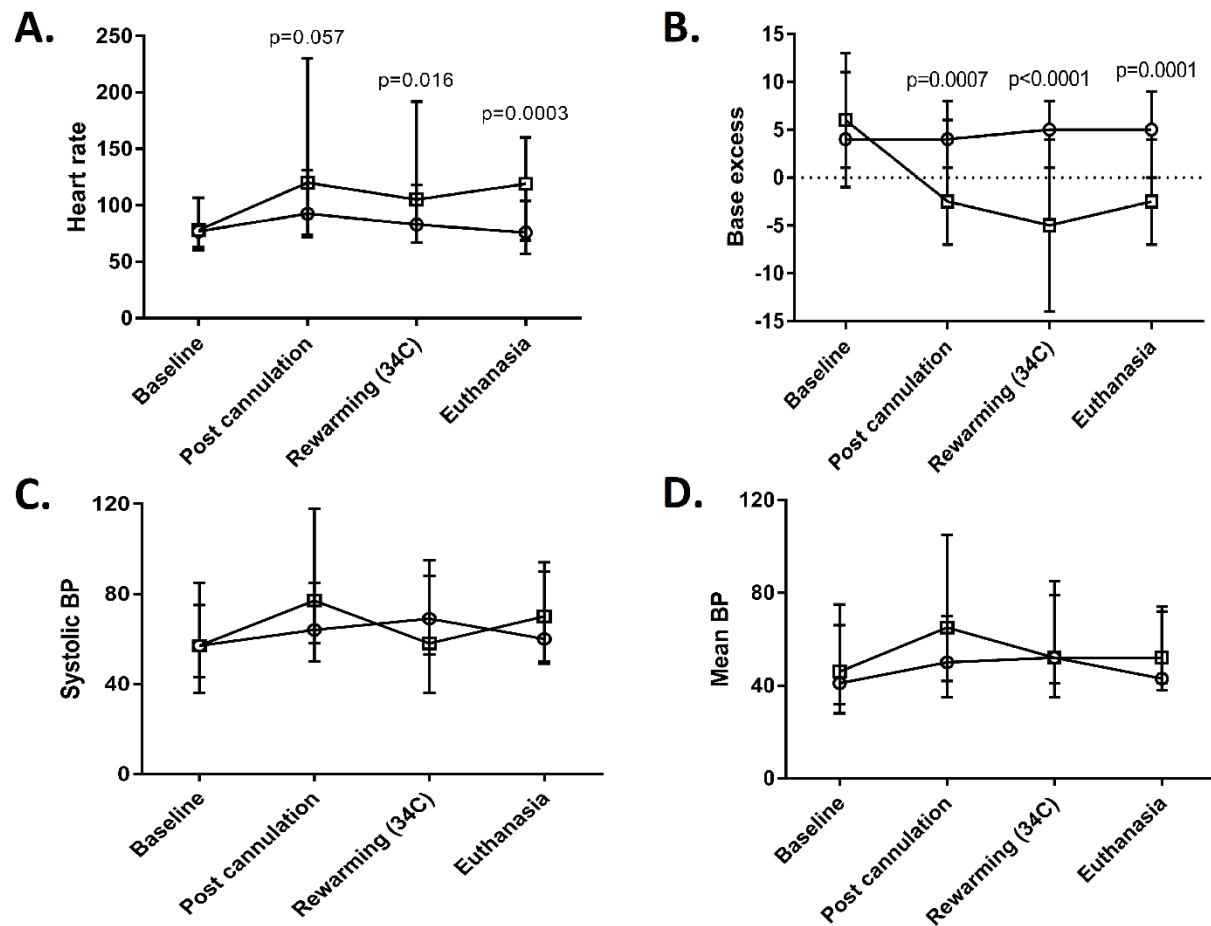

**Supplemental Figure S1:** Differences in physiologic parameters between animals undergoing CPB/DHCA compared to anesthesia controls. CPB/DHCA= cardiopulmonary bypass with deep hypothermic circulatory arrest

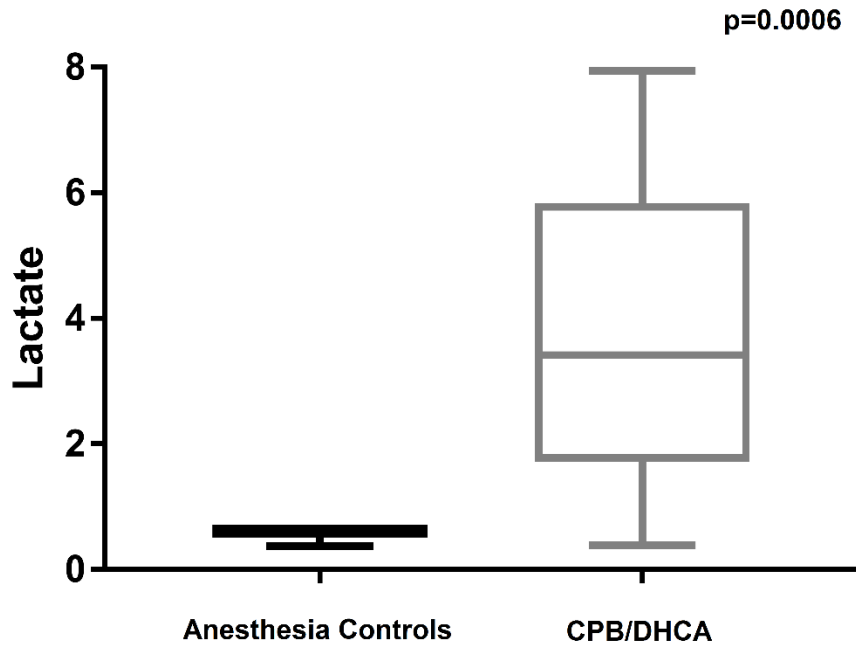

**Supplemental Figure S2:** Distribution of pre-euthanasia serum lactate levels in animals exposed to CPB/DHCA versus anesthesia-only controls. CPB/DHCA= cardiopulmonary bypass with deep hypothermic circulatory arrest

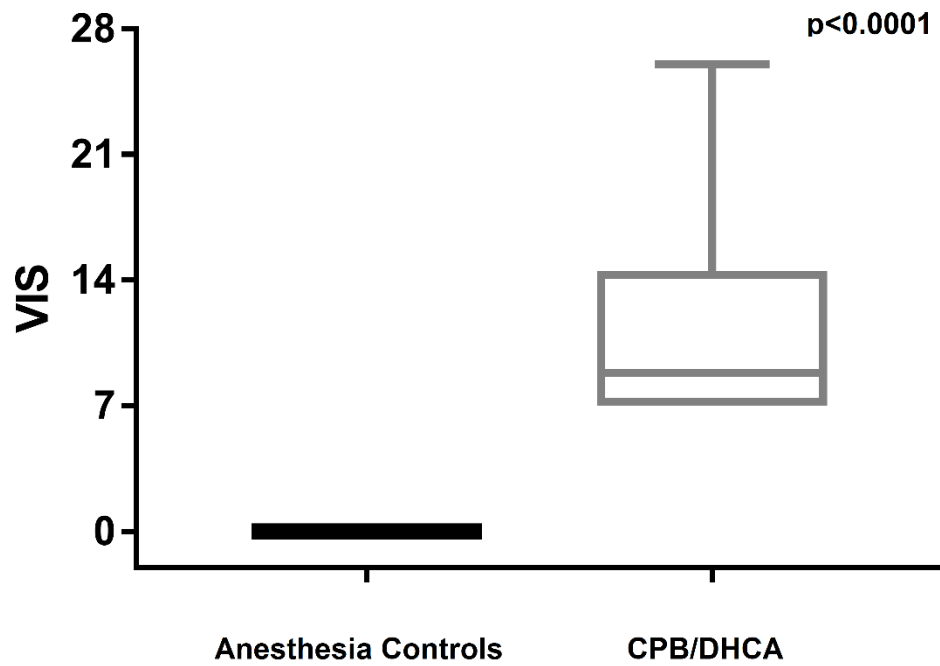

**Supplemental Figure S3:** Distribution of pre-euthanasia VIS in animals exposed to CPB/DHCA versus anesthesia-only controls. CPB/DHCA= cardiopulmonary bypass with deep hypothermic circulatory arrest; VIS=vasoactive inotropic score

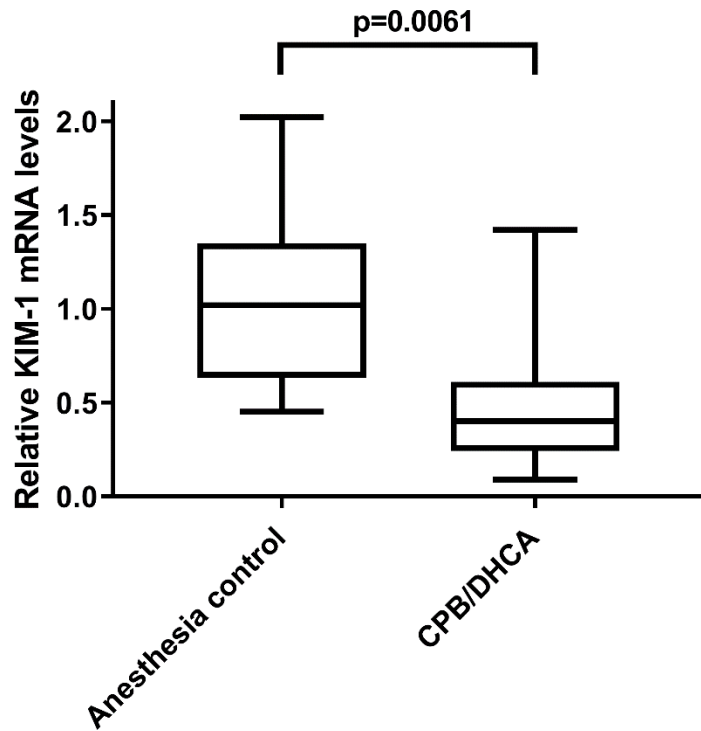

**Supplemental Figure S4:** Distribution of relative kidney tissue KIM-1 mRNA levels in animals exposed to CPB/DHCA versus anesthesia-only controls. CPB/DHCA= cardiopulmonary bypass with deep hypothermic circulatory arrest; KIM-1=kidney injury molecule-1

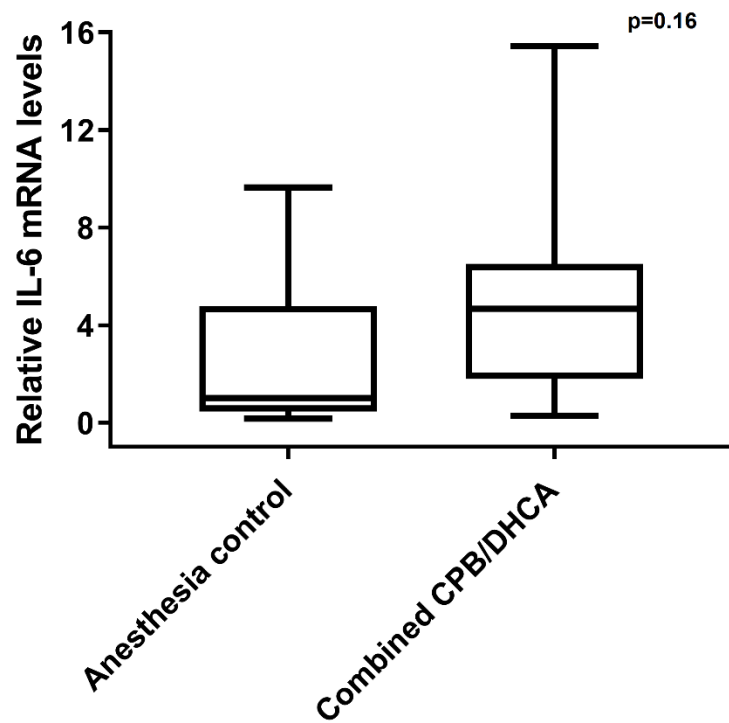

**Supplemental Figure S5:** Distribution of relative kidney tissue IL-6 mRNA levels in animals exposed to CPB/DHCA versus anesthesia-only controls. CPB/DHCA= cardiopulmonary bypass with deep hypothermic circulatory arrest; IL-6=interleukin-6

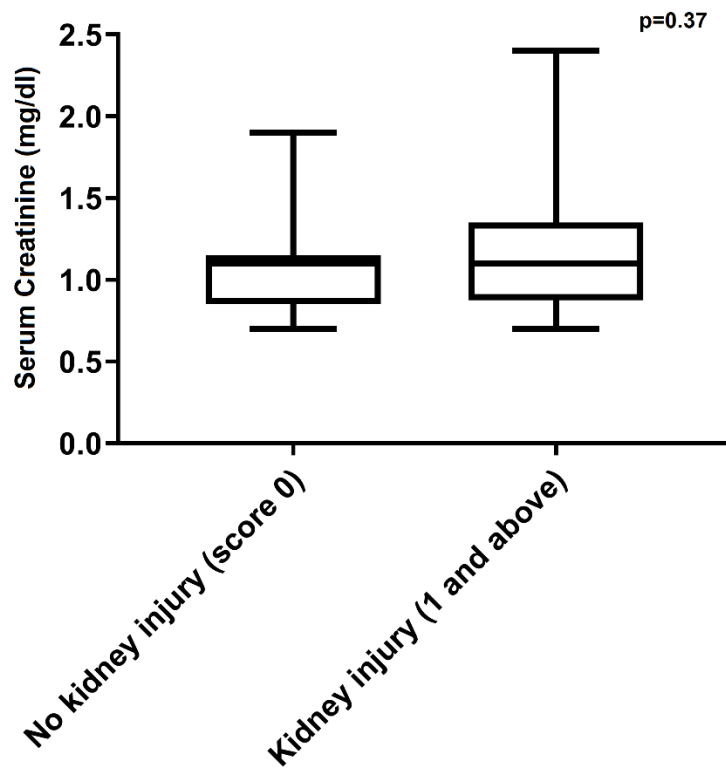

**Supplemental Figure S6:** Distribution of pre-euthanasia serum creatinine levels in animals with and without histologic evidence of acute kidney injury (kidney injury score 1-4 vs 0).

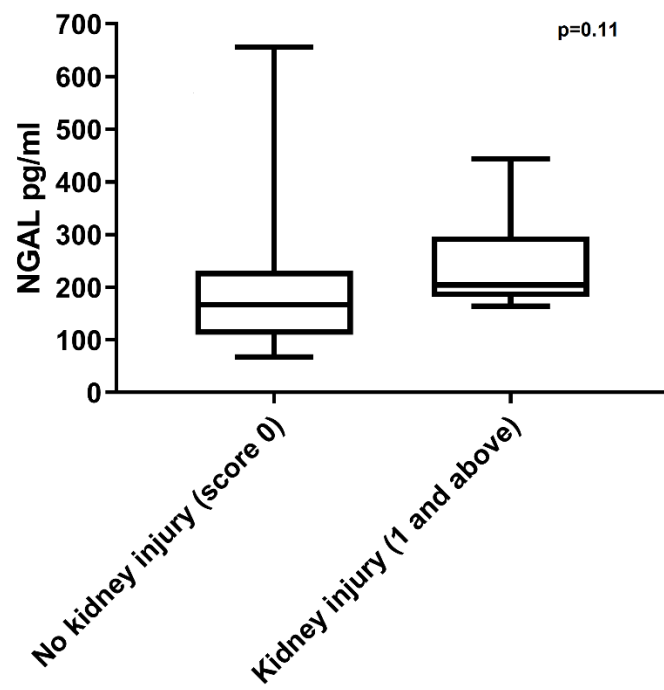

**Supplemental Figure S7:** Distribution of pre-euthanasia serum NGAL levels in animals with and without histologic evidence of acute kidney injury (kidney injury score 1-4 vs 0).

NGAL=neutrophil gelatinase-associated lipocalin

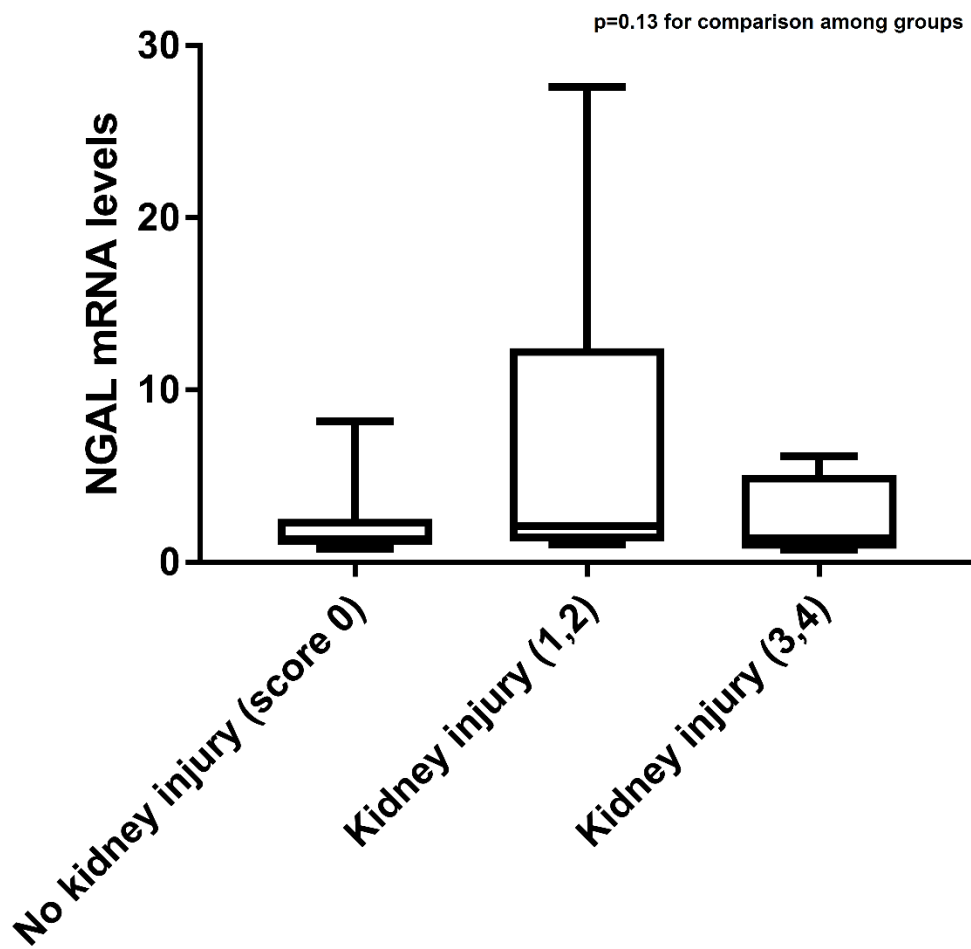

**Supplemental Figure S8:** Distribution of relative kidney tissue NGAL mRNA grouped by histologic kidney injury score (kidney injury score 0 vs 1-2 vs 3-4). P-value for Kruskal Wallis testing among multiple groups NGAL=neutrophil gelatinase-associated lipocalin

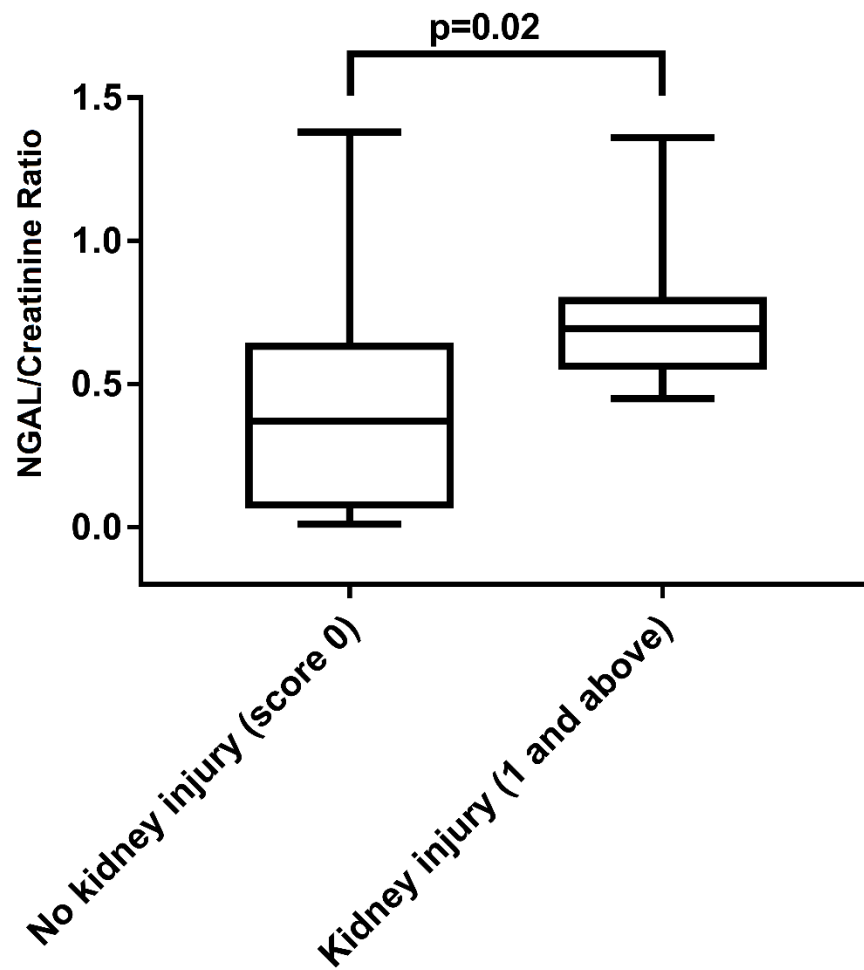

**Supplemental Figure S9:** Distribution of pre-euthanasia urine NGAL/creatinine ratios in animals with and without histologic evidence of acute kidney injury (kidney injury score 1-4 vs 0). NGAL=neutrophil gelatinase-associated lipocalin

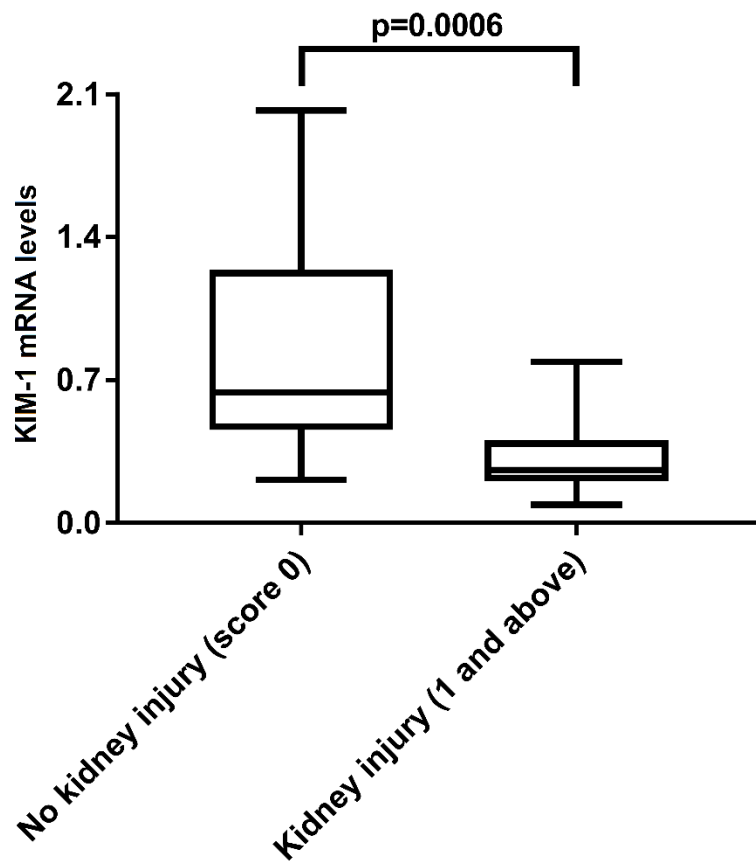

**Supplemental Figure S10:** Distribution of relative kidney tissue KIM-1 mRNA levels in animals with and without histologic evidence of acute kidney injury (kidney injury score 1-4 vs 0). KIM-1=kidney injury molecule-1

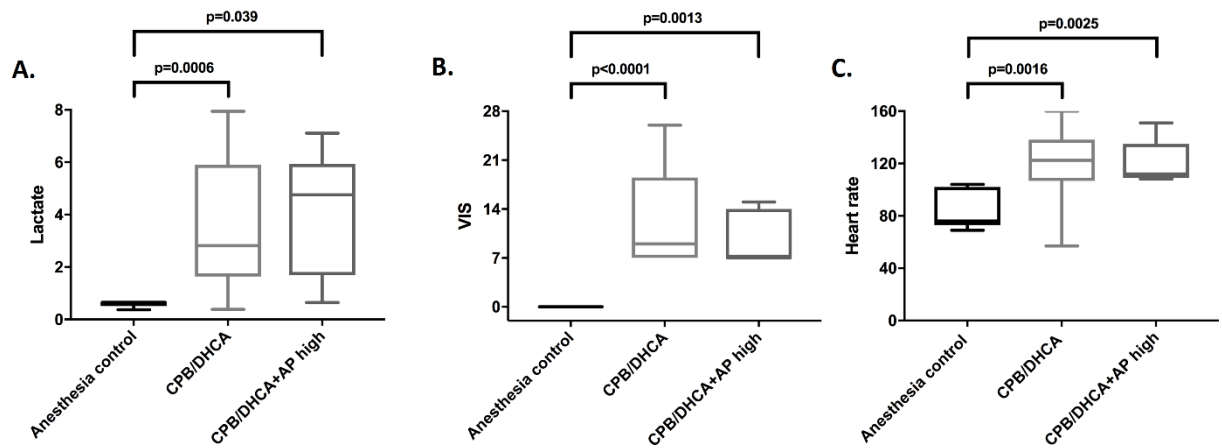

**Supplemental Figure S11:** Distributions of pre-euthanasia lactate, VIS, and heart rate in animals undergoing CPB/DHCA with high dose AP compared to the remaining CPB/DHCA animals or anesthesia controls. VIS=vasoactive inotropic score; CPB/DHCA= cardiopulmonary bypass with deep hypothermic circulatory arrest; AP=alkaline phosphatase

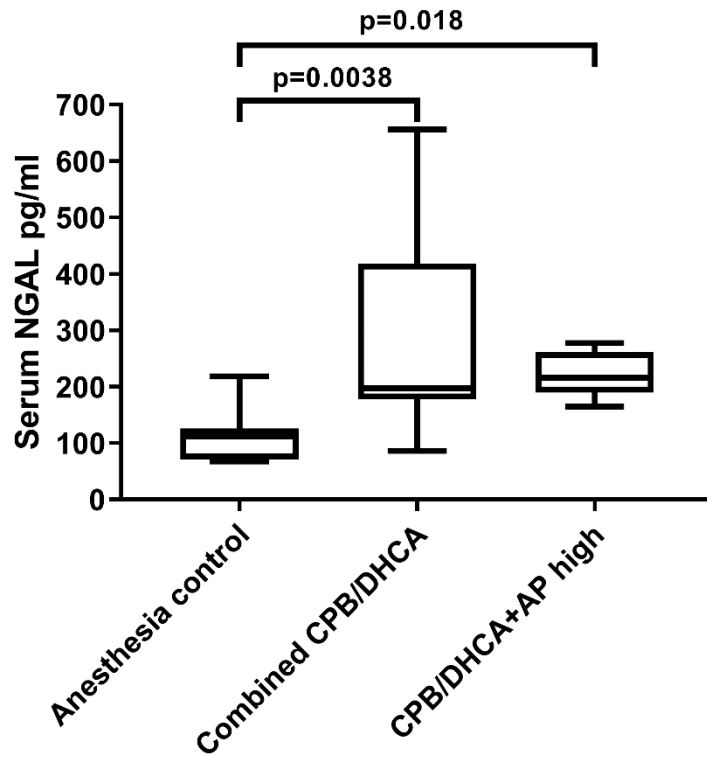

**Supplemental Figure S12:** Distribution of pre-euthanasia serum NGAL in animals undergoing CPB/DHCA with high dose AP compared to the remaining CPB/DHCA animals or anesthesia controls. NGAL= neutrophil gelatinase-associated lipocalin; CPB/DHCA= cardiopulmonary bypass with deep hypothermic circulatory arrest; AP=alkaline phosphatase

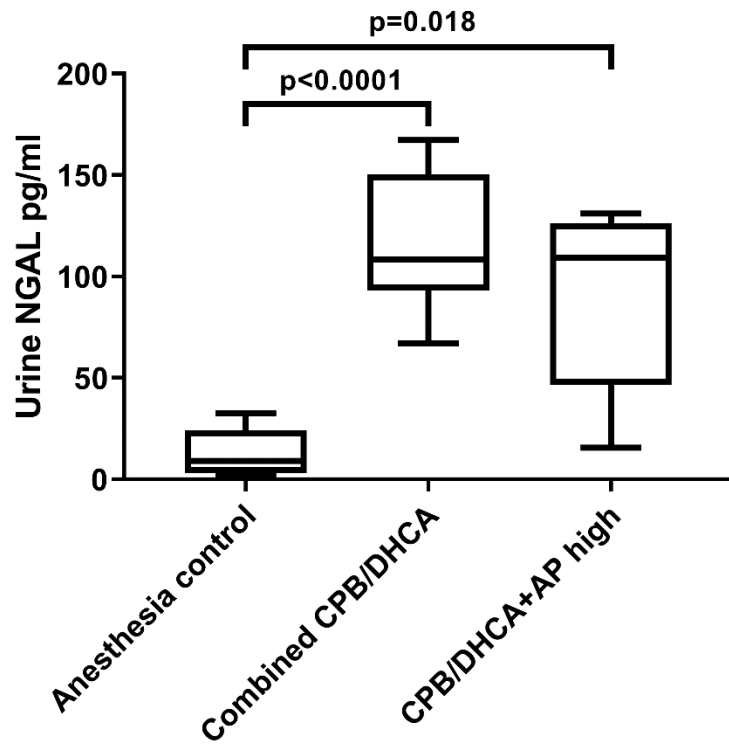

**Supplemental Figure S13:** Distribution of pre-euthanasia urine NGAL in animals undergoing CPB/DHCA with high dose AP compared to the remaining CPB/DHCA animals or anesthesia controls. NGAL= neutrophil gelatinase-associated lipocalin; CPB/DHCA= cardiopulmonary bypass with deep hypothermic circulatory arrest; AP=alkaline phosphatase

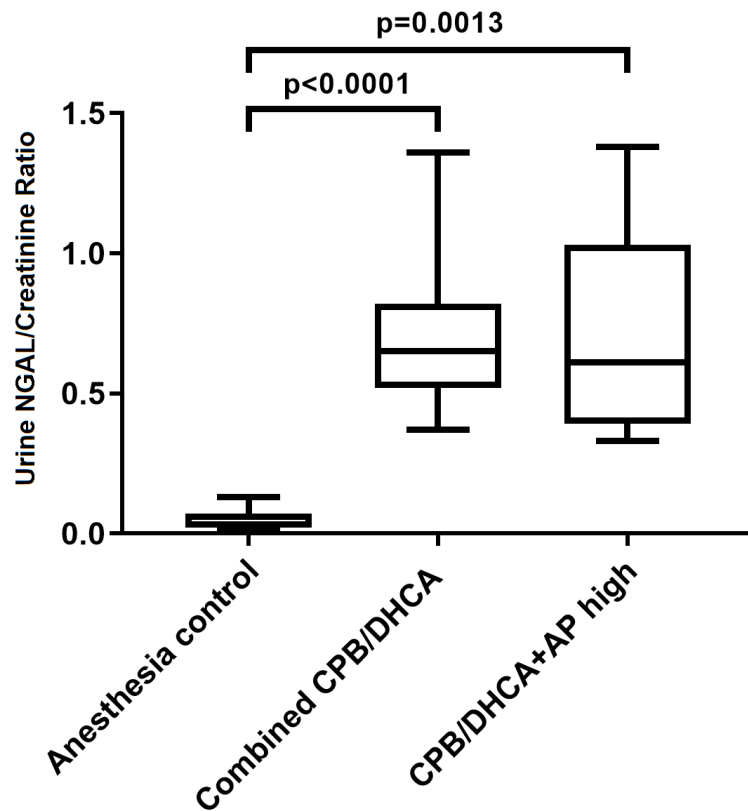

**Supplemental Figure S14:** Distribution of pre-euthanasia urine NGAL/creatinine ratios in animals undergoing CPB/DHCA with high dose AP compared to the remaining CPB/DHCA animals or anesthesia controls. NGAL= neutrophil gelatinase-associated lipocalin; CPB/DHCA= cardiopulmonary bypass with deep hypothermic circulatory arrest; AP=alkaline phosphatase

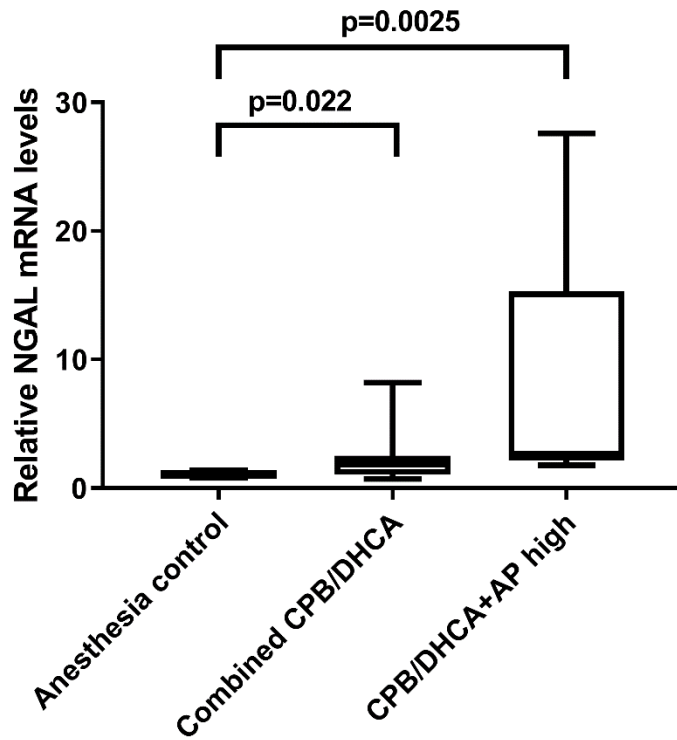

**Supplemental Figure S15:** Distribution of relative kidney tissue NGAL mRNA levels in animals undergoing CPB/DHCA with high dose AP compared to the remaining CPB/DHCA animals or anesthesia controls. NGAL= neutrophil gelatinase-associated lipocalin; CPB/DHCA= cardiopulmonary bypass with deep hypothermic circulatory arrest; AP=alkaline phosphatase

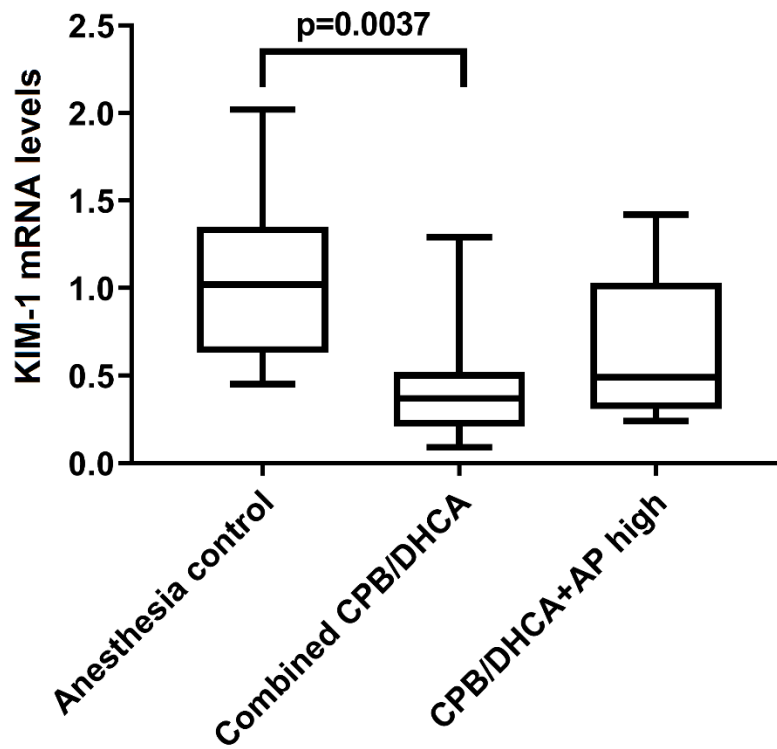

**Supplemental Figure S16:** Distribution of relative kidney tissue KIM-1 mRNA levels in animals undergoing CPB/DHCA with high dose AP compared to the remaining CPB/DHCA animals or anesthesia controls. KIM-1=kidney injury molecule-1; CPB/DHCA= cardiopulmonary bypass with deep hypothermic circulatory arrest; AP=alkaline phosphatase

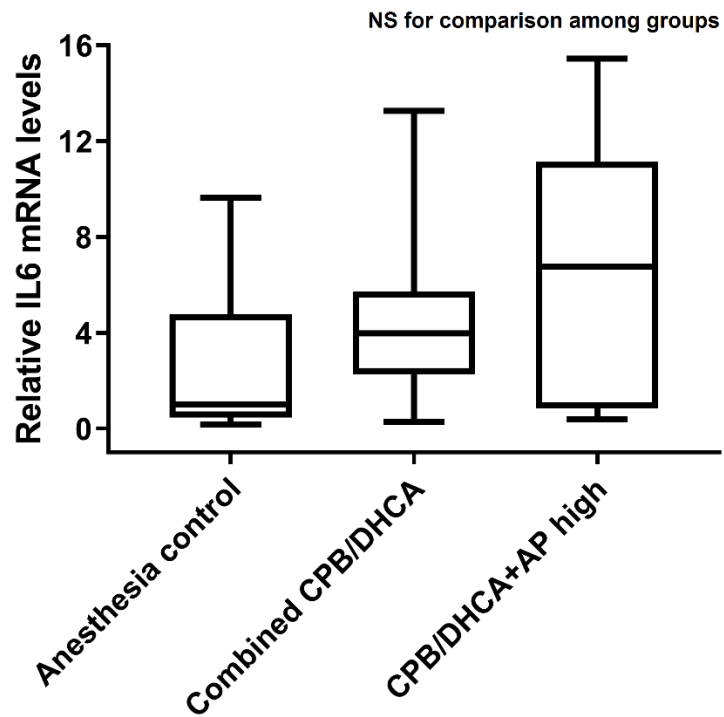

**Supplemental Figure S17:** Distribution of relative kidney tissue IL-6 mRNA levels in animals undergoing CPB/DHCA with high dose AP compared to the remaining CPB/DHCA animals or anesthesia controls. IL-6=interleukin-6; CPB/DHCA= cardiopulmonary bypass with deep hypothermic circulatory arrest; AP=alkaline phosphatase; NS=not significant on Kruskal Wallis testing for differences among groups
